# Supplementary material for: Phytochemicals from Anneslea fragrans Wall. and Their Hepatoprotective and Anti-Inflammatory Activities
Source: Molecules. 2023 Jul 18;28(14):5480. doi: 10.3390/molecules28145480 (PMC10384535; doi:10.3390/molecules28145480)

# **Phytochemicals from *Anneslea fragrans* Wall. and Their Hepatoprotective and Anti-Inflammatory Activities**

**Yan Wang<sup>1,†</sup>, Changshu Cheng<sup>1,†</sup>, Tianrui Zhao<sup>1</sup>, Jianxin Cao<sup>1</sup>, Yaping Liu<sup>1</sup>,  
Yudan Wang<sup>2</sup>, Wenbing Zhou<sup>3</sup> and Guiguang Cheng<sup>1,\*</sup>**

<sup>1</sup> Faculty of Food Science and Engineering, Kunming University of Science and Technology, Kunming 650500, China; 20212114040@stu.kust.edu.cn (Y.W.); chengchangshu0409@163.com (C.C.); food363@163.com (T.Z.); jxcao321@hotmail.com (J.C.); liuyaping@kust.edu.cn (Y.L.)

<sup>2</sup> Key Laboratory of Chemistry in Ethnic Medicinal Resources, State Ethnic Affairs Commission and Ministry of Education, Yunnan Minzu University, Kunming 650500, China; sdlcwyd@163.com

<sup>3</sup> Yunnan Tobacco Company, Yuxi Branch, Yuxi 653100, China; yaowufx2001@163.com

\* Correspondence: ggcheng@kmust.edu.cn

† These authors contributed equally to this work.

## Contents of Supporting Information

| No | Contents                                   | Page |
|----|--------------------------------------------|------|
| 1  | Figure S1: The HPLC of compound <b>1</b>   | 3    |
| 2  | Figure S2: The HPLC of compound <b>2</b>   | 4    |
| 3  | Figure S3: The HPLC of compound <b>3</b>   | 5    |
| 4  | Figure S4: The HPLC of compound <b>4</b>   | 6    |
| 5  | Figure S5: The HPLC of compound <b>5</b>   | 7    |
| 6  | Figure S6: The HPLC of compound <b>6</b>   | 8    |
| 7  | Figure S7: The HPLC of compound <b>7</b>   | 9    |
| 8  | Figure S8: The HPLC of compound <b>8</b>   | 10   |
| 9  | Figure S9: The HPLC of compound <b>9</b>   | 11   |
| 10 | Figure S10: The HPLC of compound <b>10</b> | 12   |
| 11 | Figure S11: The HPLC of compound <b>11</b> | 13   |
| 12 | Figure S12: The HPLC of compound <b>12</b> | 14   |
| 13 | Figure S13: The HPLC of compound <b>13</b> | 15   |
| 14 | Figure S14: The HPLC of compound <b>14</b> | 16   |
| 15 | Figure S15: The HPLC of compound <b>15</b> | 17   |
| 16 | Figure S16: The HPLC of compound <b>16</b> | 18   |
| 17 | Figure S17: The HPLC of compound <b>17</b> | 19   |
| 18 | Figure S18: The HPLC of compound <b>18</b> | 20   |

**Figure S1.** The HPLC of compound 1.

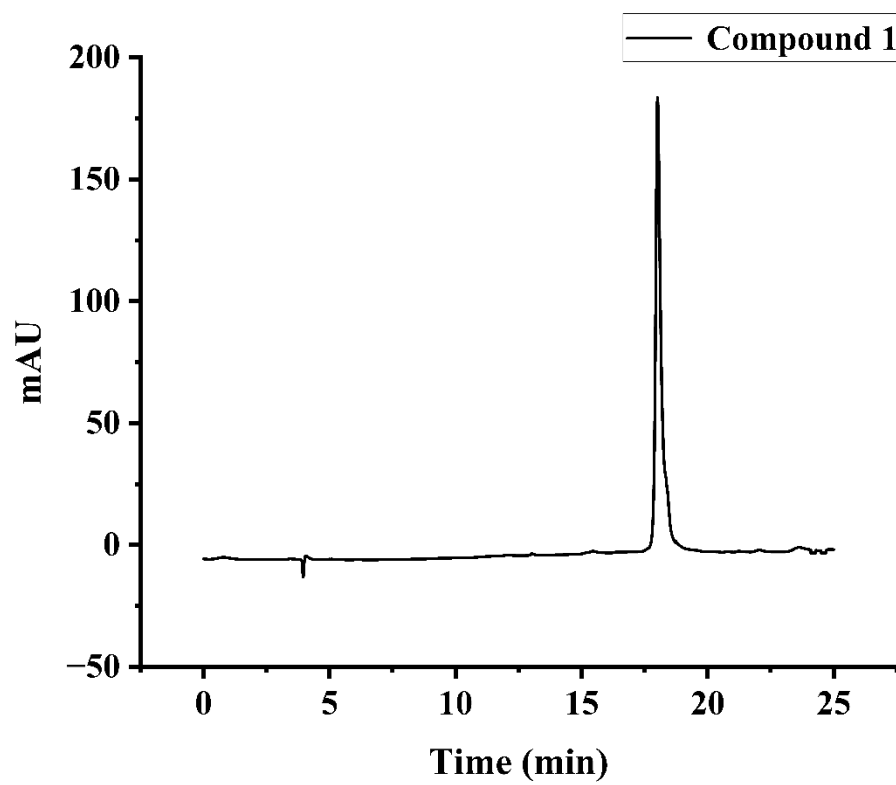

**Figure S2.** The HPLC of compound 2.

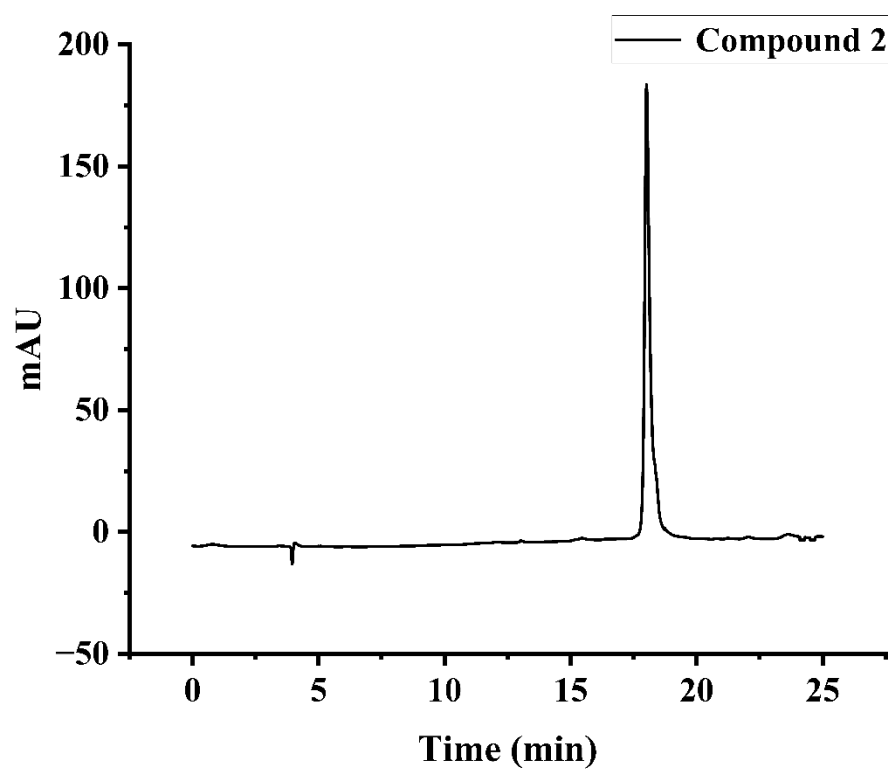

**Figure S3.** The HPLC of compound **3**.

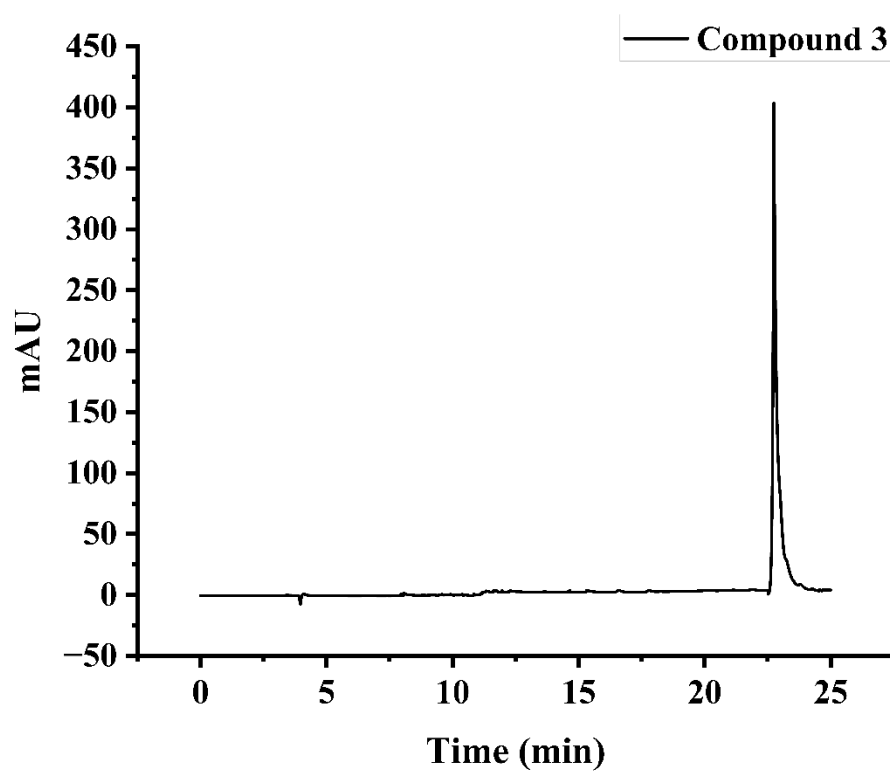

**Figure S4.** The HPLC of compound 4.

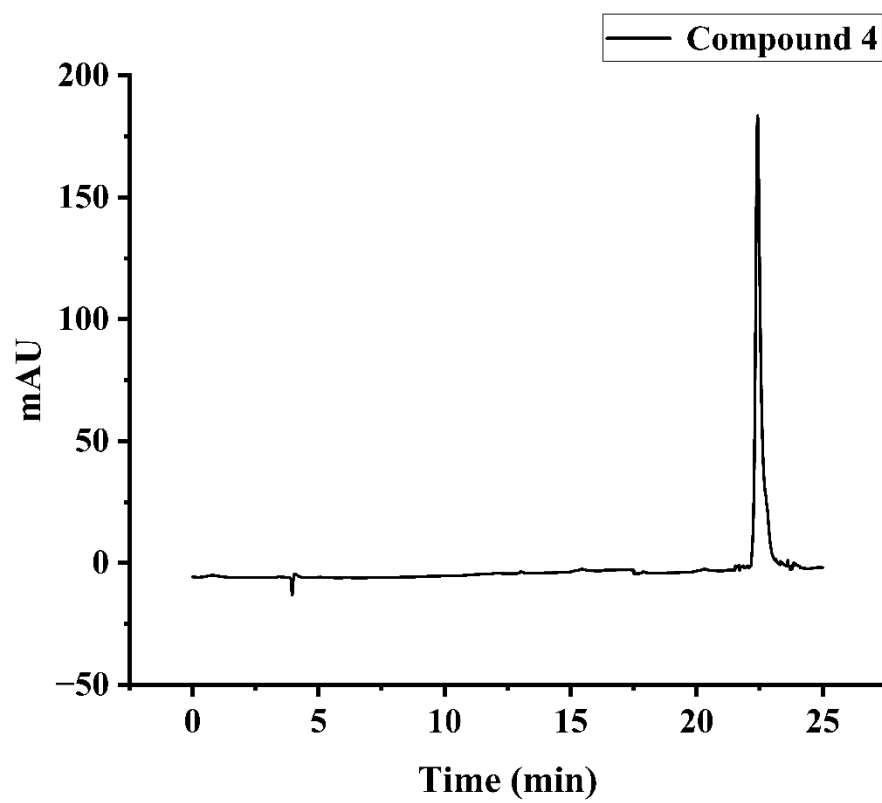

**Figure S5.** The HPLC of compound **5**.

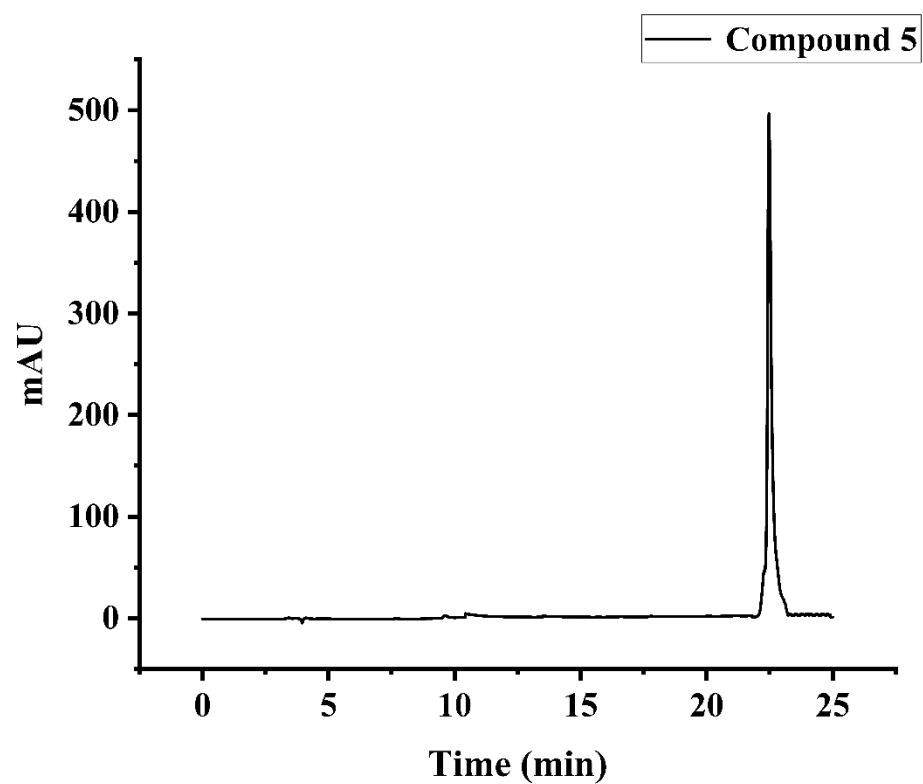

**Figure S6.** The HPLC of compound **6**.

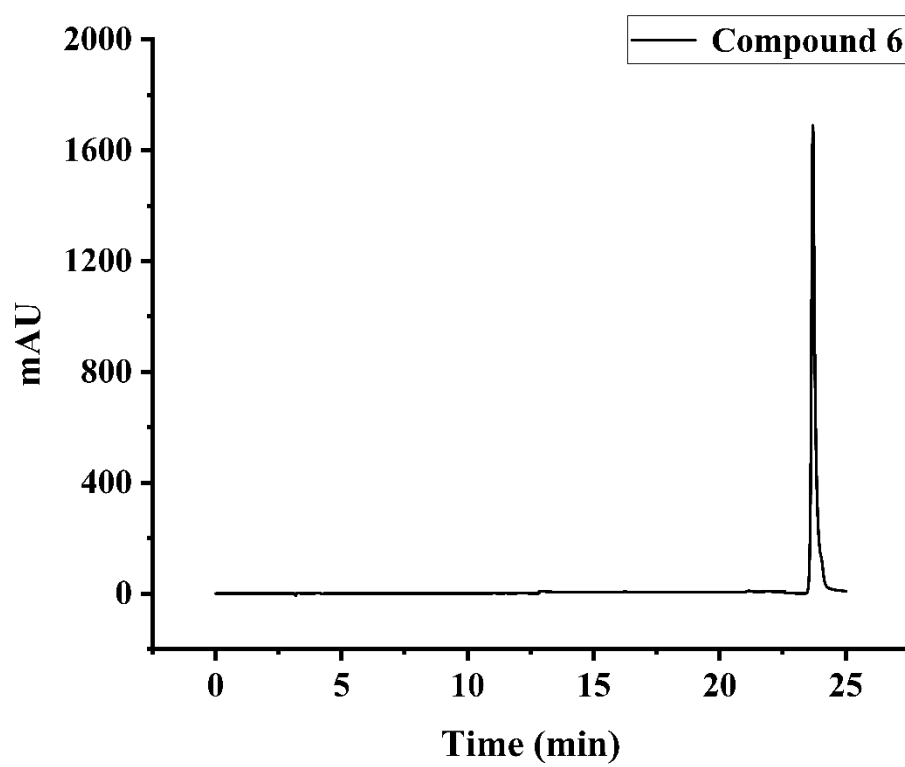

**Figure S7.** The HPLC of compound 7.

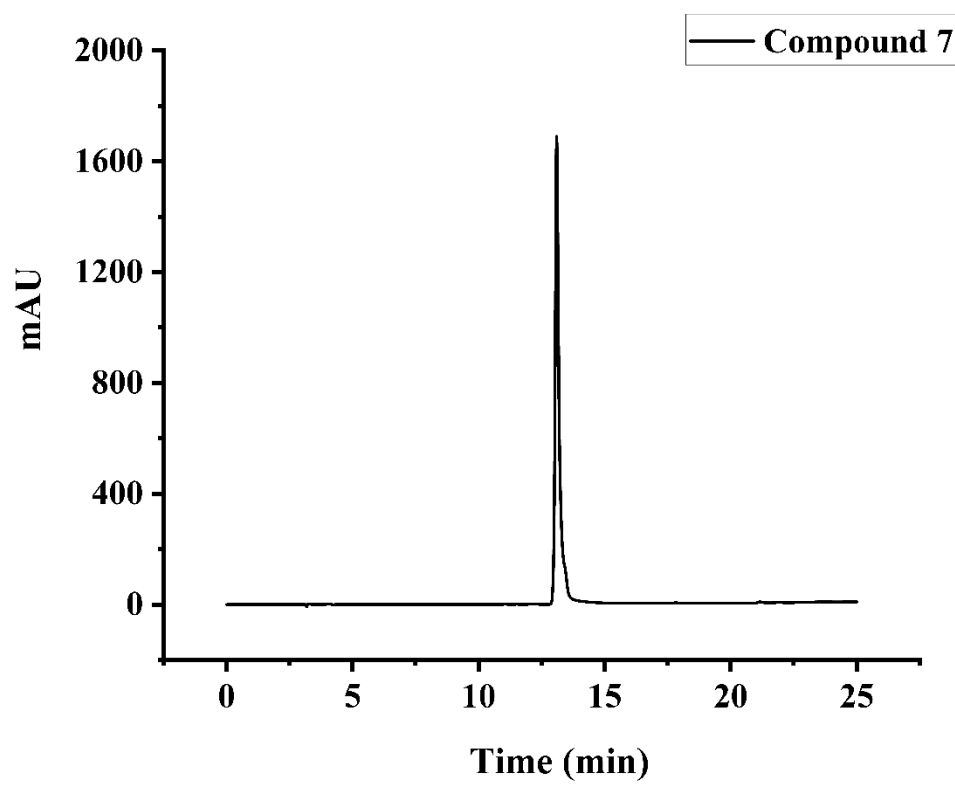

**Figure S8.** The HPLC of compound **8**.

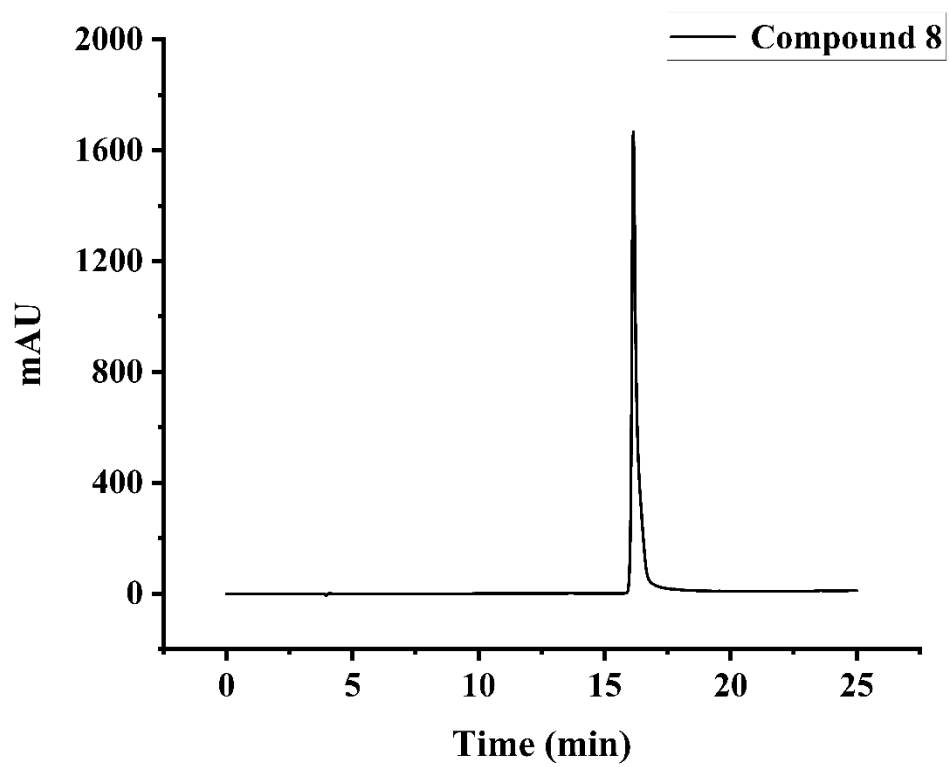

**Figure S9.** The HPLC of compound **9**.

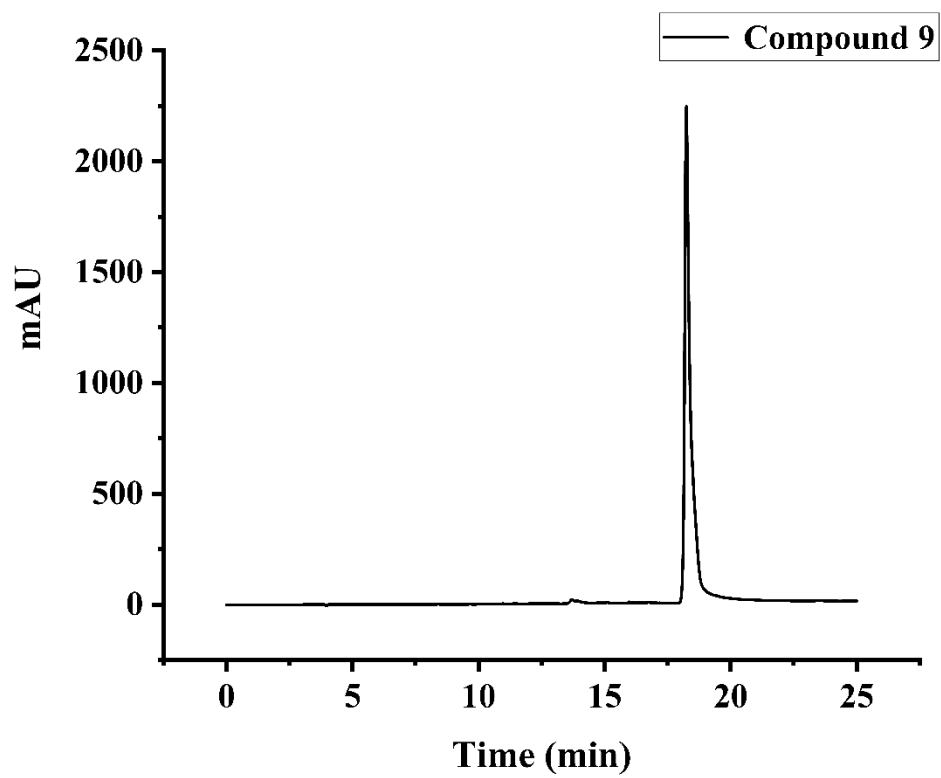

**Figure S10.** The HPLC of compound **10**.

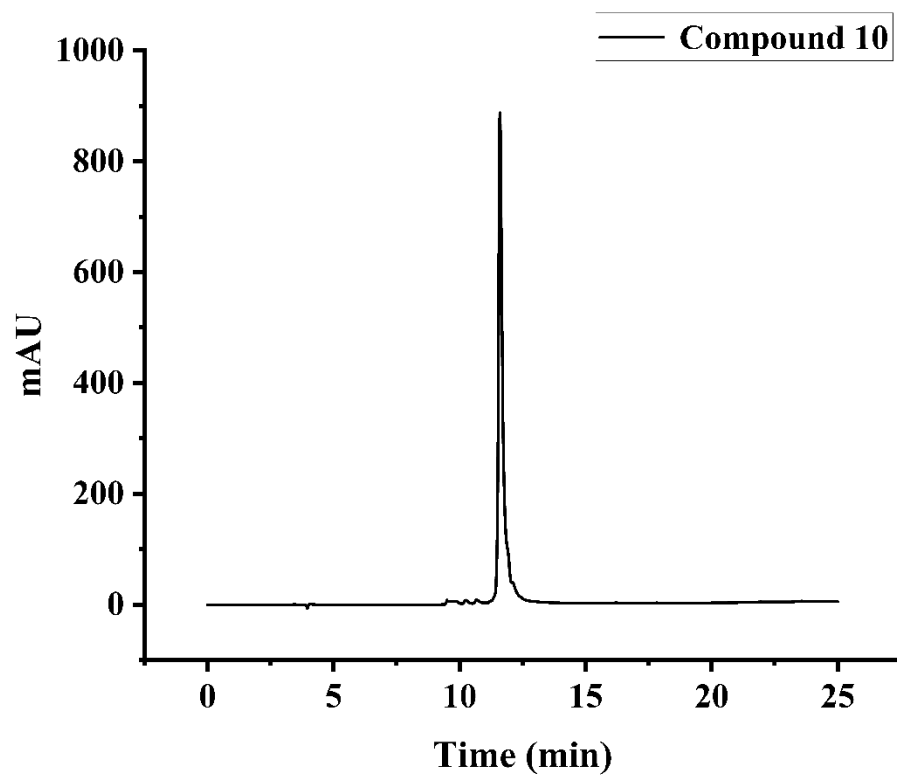

**Figure S11.** The HPLC of compound **11**.

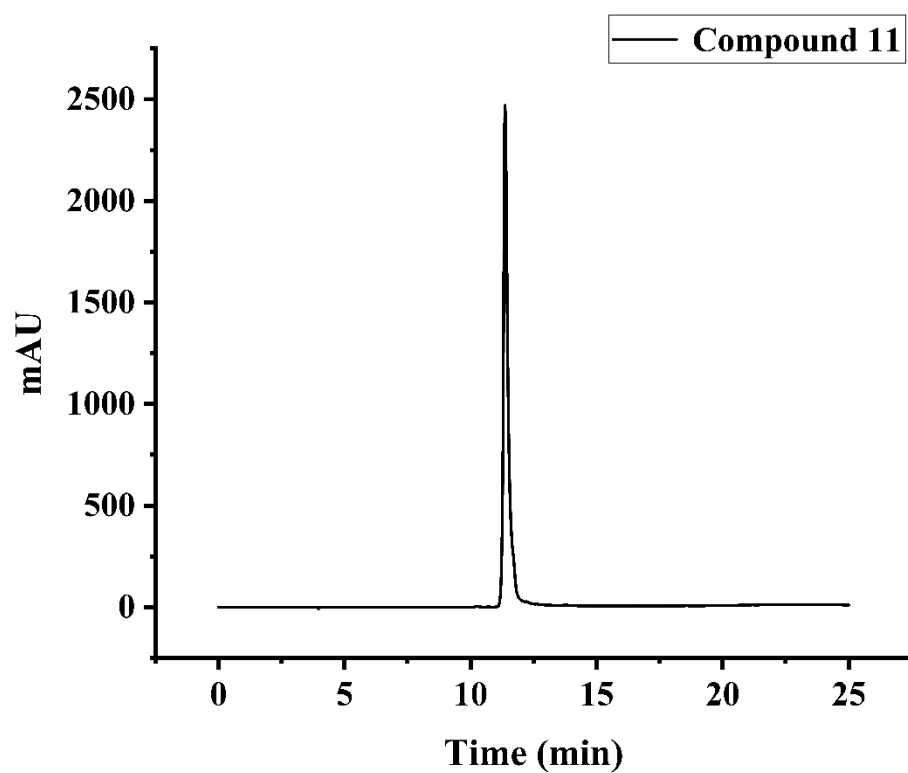

**Figure S12.** The HPLC of compound **12**.

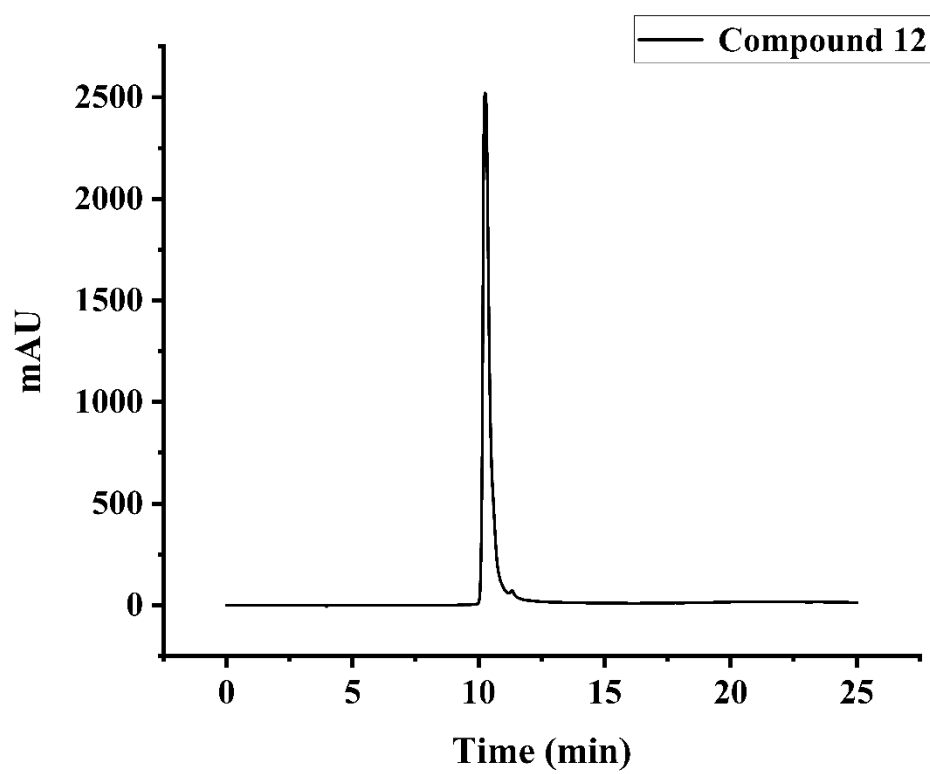

**Figure S13.** The HPLC of compound **13**.

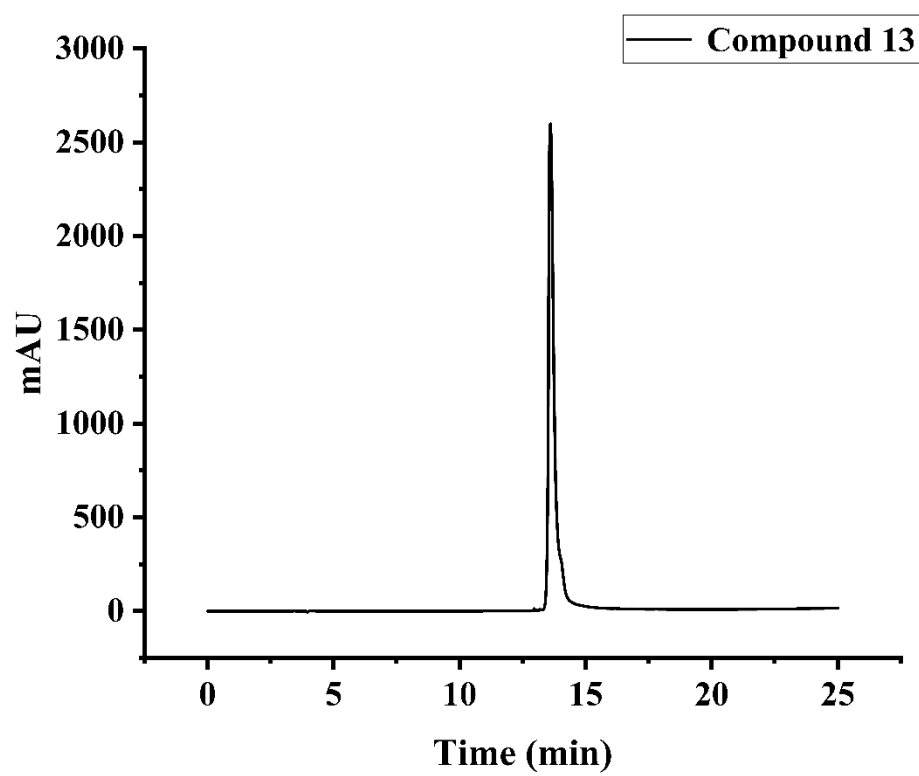

**Figure S14.** The HPLC of compound **14**.

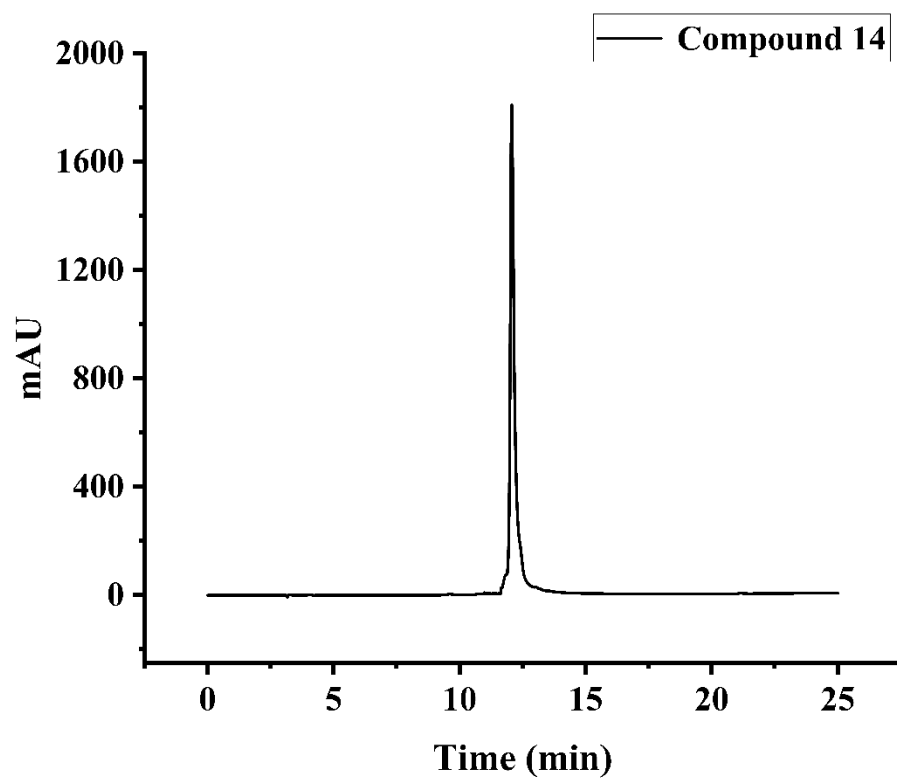

**Figure S15.** The HPLC of compound **15**.

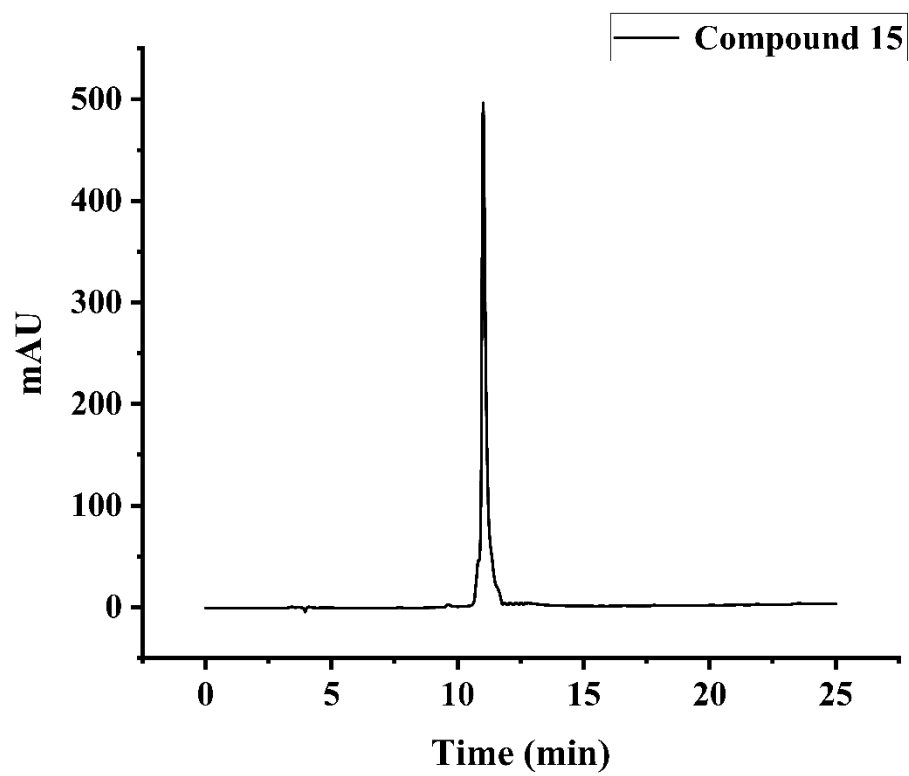

**Figure S16.** The HPLC of compound **16**.

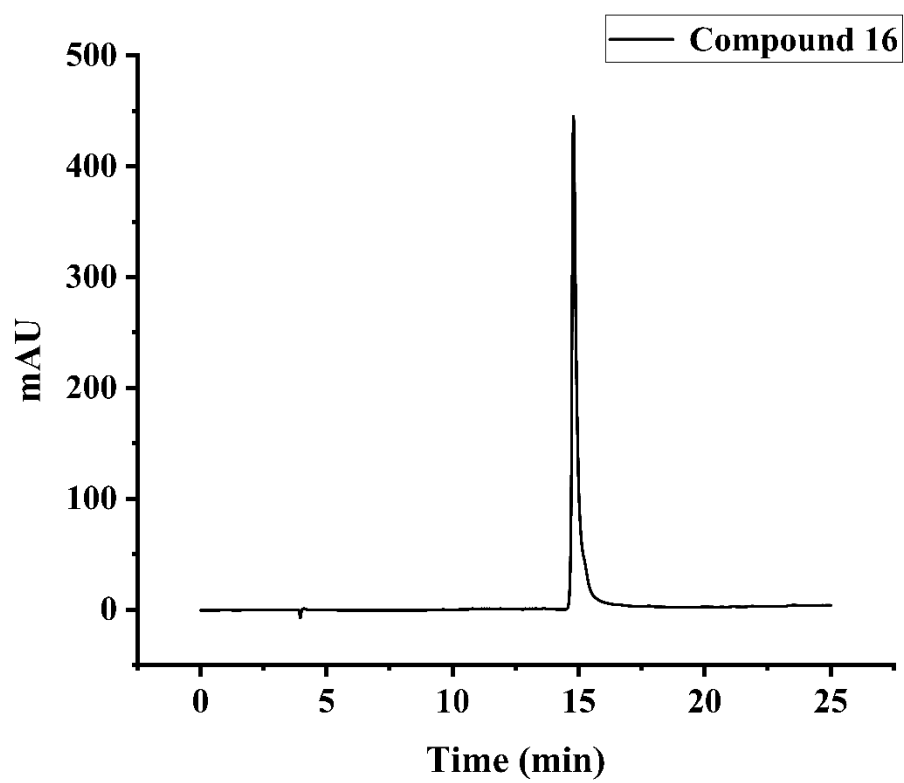

**Figure S17.** The HPLC of compound 17.

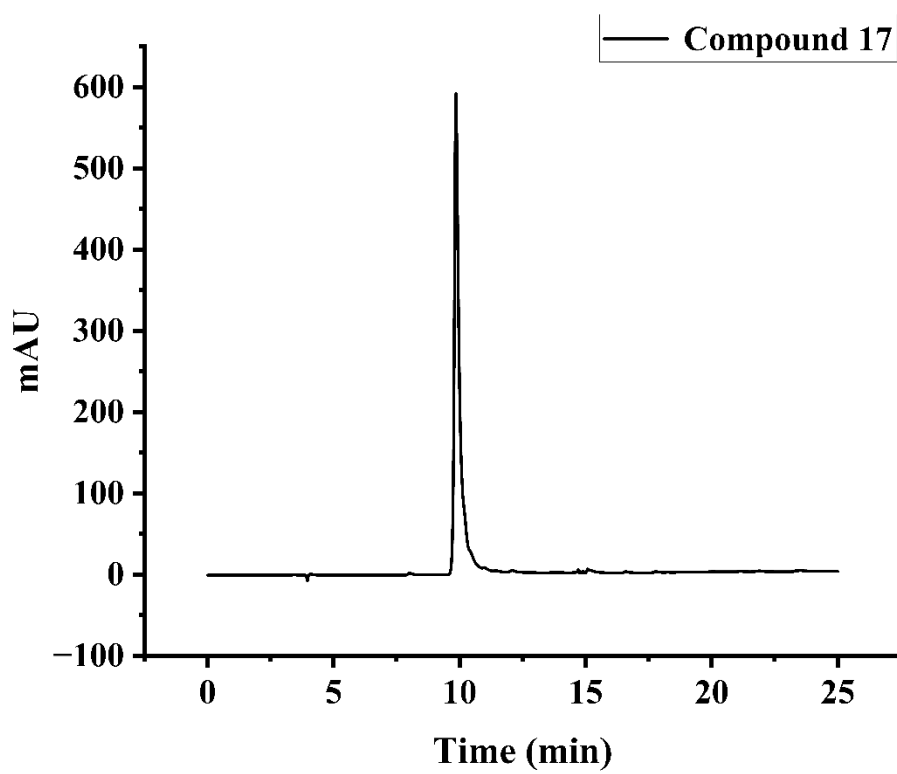

**Figure S18.** The HPLC of compound **18**.

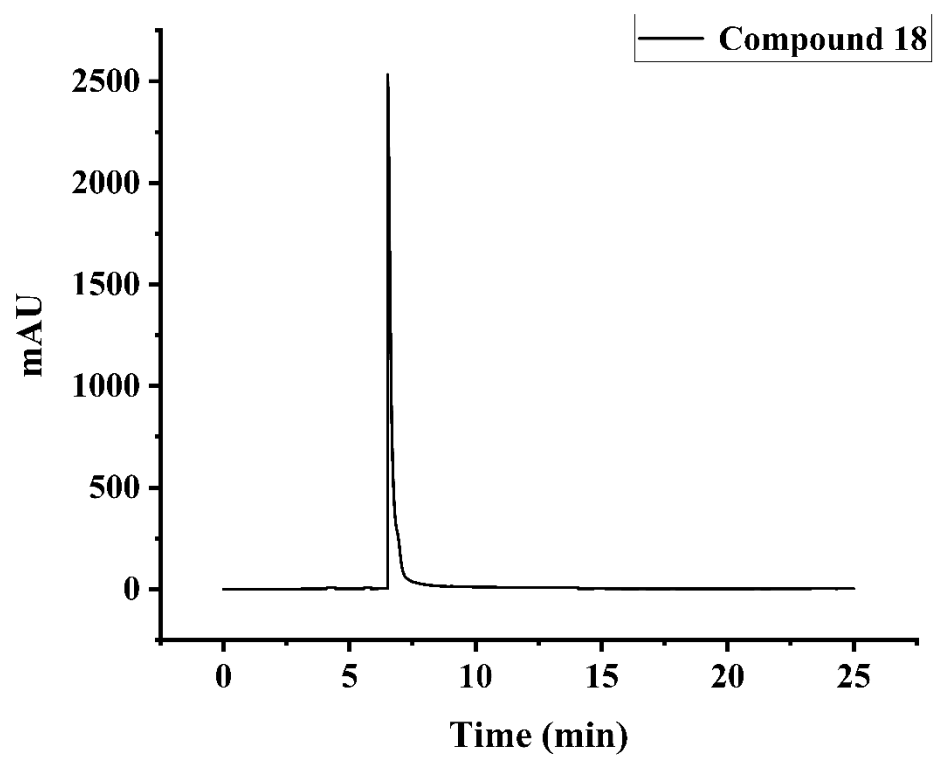

Supplement: Supplementary file 1 [file molecules-28-05480-s001.zip › Supplementary Figure.pdf]
