# Supplementary material for: Phytochemicals from Anneslea fragrans Wall. and Their Hepatoprotective and Anti-Inflammatory Activities
Source: Molecules. 2023 Jul 18;28(14):5480. doi: 10.3390/molecules28145480 (PMC10384535; doi:10.3390/molecules28145480)
Supplement: Supplementary file 1 [file molecules-28-05480-s001.zip › Supplementary Table.pdf]

# **Phytochemicals from *Anneslea fragrans* Wall. and Their Hepatoprotective and Anti-Inflammatory Activities**

**Yan Wang**<sup>1,†</sup>, **Changshu Cheng**<sup>1,†</sup>, **Tianrui Zhao**<sup>1</sup>, **Jianxin Cao**<sup>1</sup>, **Yaping Liu**<sup>1</sup>,  
**Yudan Wang**<sup>2</sup>, **Wenbing Zhou**<sup>3</sup> and **Guiguang Cheng**<sup>1,\*</sup>

<sup>1</sup> Faculty of Food Science and Engineering, Kunming University of Science and Technology, Kunming 650500, China; 20212114040@stu.kust.edu.cn (Y.W.); chengchangshu0409@163.com (C.C.); food363@163.com (T.Z.); jxcao321@hotmail.com (J.C.); liuyaping@kust.edu.cn (Y.L.)

<sup>2</sup> Key Laboratory of Chemistry in Ethnic Medicinal Resources, State Ethnic Affairs Commission and Ministry of Education, Yunnan Minzu University, Kunming 650500, China; sdlewyd@163.com

<sup>3</sup> Yunnan Tobacco Company, Yuxi Branch, Yuxi 653100, China; yaowufx2001@163.com

\* Correspondence: ggcheng@kmust.edu.cn

† These authors contributed equally to this work.

## **Contents of Supporting Information**

| <b>No</b> | <b>Contents</b>                                                                 | <b>Page</b> |
|-----------|---------------------------------------------------------------------------------|-------------|
| 1         | Table S1: The cytotoxic effect of compounds on the survival rate of HepG2 cells | 3           |
| 2         | Table S2: Effects of isolated compounds on the survival rate of RAW264.7 cells  | 4           |

**Table S1.** The cytotoxic effect of compounds on the survival rate of HepG2 cells.

| Compounds | Concentration( $\mu$ M) |                   |                   |
|-----------|-------------------------|-------------------|-------------------|
|           | 50                      | 100               | 150               |
| 1         | 96.73 $\pm$ 3.33        | 94.33 $\pm$ 2.72  | 92.36 $\pm$ 4.27  |
| 2         | 113.92 $\pm$ 1.14       | 108.91 $\pm$ 3.21 | 97.54 $\pm$ 2.45  |
| 3         | 98.66 $\pm$ 2.76        | 94.64 $\pm$ 4.48  | 88.36 $\pm$ 2.41  |
| 4         | 113.94 $\pm$ 5.24       | 102.15 $\pm$ 3.25 | 96.18 $\pm$ 3.64  |
| 5         | 99.35 $\pm$ 3.26        | 95.25 $\pm$ 4.26  | 93.23 $\pm$ 2.52  |
| 6         | 114.11 $\pm$ 2.42       | 107.23 $\pm$ 3.54 | 102.1 $\pm$ 1.53  |
| 7         | 105.79 $\pm$ 3.36       | 101.04 $\pm$ 3.21 | 96.75 $\pm$ 0.74  |
| 8         | 113.93 $\pm$ 5.44       | 105.85 $\pm$ 2.24 | 104.37 $\pm$ 1.32 |
| 9         | 103.72 $\pm$ 2.73       | 91.95 $\pm$ 0.66  | 79.45 $\pm$ 0.89  |
| 10        | 93.27 $\pm$ 1.14        | 96.18 $\pm$ 0.89  | 93.93 $\pm$ 1.70  |
| 11        | 103.07 $\pm$ 3.13       | 103.71 $\pm$ 1.21 | 99.61 $\pm$ 2.43  |
| 12        | 107.13 $\pm$ 1.27       | 108.87 $\pm$ 3.20 | 103.95 $\pm$ 1.09 |
| 13        | 103.14 $\pm$ 1.37       | 102.44 $\pm$ 4.73 | 98.47 $\pm$ 2.14  |
| 14        | 105.05 $\pm$ 0.68       | 105.14 $\pm$ 1.12 | 101.54 $\pm$ 0.98 |
| 15        | 101.15 $\pm$ 2.78       | 101.82 $\pm$ 0.96 | 101.16 $\pm$ 1.58 |
| 16        | 96.75 $\pm$ 2.31        | 96.34 $\pm$ 2.26  | 98.23 $\pm$ 3.16  |
| 17        | 93.12 $\pm$ 1.36        | 96.51 $\pm$ 1.52  | 92.27 $\pm$ 0.75  |
| 18        | 102.37 $\pm$ 1.21       | 102.41 $\pm$ 1.88 | 95.06 $\pm$ 0.85  |

**Table S2.** Effects of isolated compounds on the survival rate of RAW264.7 cells.

| Compounds | Concentration( $\mu$ M) |                   |                   |
|-----------|-------------------------|-------------------|-------------------|
|           | 50                      | 100               | 200               |
| 1         | 96.73 $\pm$ 3.33        | 96.31 $\pm$ 2.72  | 95.36 $\pm$ 2.22  |
| 2         | 94.92 $\pm$ 1.14        | 98.91 $\pm$ 2.27  | 97.74 $\pm$ 2.42  |
| 3         | 98.66 $\pm$ 2.76        | 94.64 $\pm$ 3.48  | 98.36 $\pm$ 2.41  |
| 4         | 103.94 $\pm$ 5.24       | 98.15 $\pm$ 3.25  | 96.18 $\pm$ 2.64  |
| 5         | 94.35 $\pm$ 3.22        | 95.47 $\pm$ 2.21  | 94.23 $\pm$ 1.98  |
| 6         | 94.12 $\pm$ 2.45        | 73.23 $\pm$ 1.54  | 36.12 $\pm$ 1.53  |
| 7         | 95.79 $\pm$ 2.78        | 101.04 $\pm$ 2.24 | 96.75 $\pm$ 0.74  |
| 8         | 93.93 $\pm$ 3.13        | 85.85 $\pm$ 1.34  | 70.37 $\pm$ 1.62  |
| 9         | 98.72 $\pm$ 2.73        | 71.95 $\pm$ 1.62  | 57.32 $\pm$ 1.82  |
| 10        | 103.92 $\pm$ 1.92       | 101.69 $\pm$ 2.11 | 102.69 $\pm$ 3.17 |
| 11        | 103.07 $\pm$ 4.13       | 97.71 $\pm$ 1.43  | 97.61 $\pm$ 2.43  |
| 12        | 107.13 $\pm$ 1.27       | 98.87 $\pm$ 3.24  | 86.59 $\pm$ 1.33  |
| 13        | 101.05 $\pm$ 0.68       | 98.14 $\pm$ 1.12  | 98.54 $\pm$ 1.67  |
| 14        | 96.75 $\pm$ 2.31        | 96.34 $\pm$ 2.26  | 98.23 $\pm$ 3.16  |
| 15        | 93.27 $\pm$ 1.14        | 96.18 $\pm$ 2.89  | 93.93 $\pm$ 2.73  |
| 16        | 101.77 $\pm$ 1.52       | 98.59 $\pm$ 1.76  | 96.75 $\pm$ 0.48  |
| 17        | 93.12 $\pm$ 1.36        | 96.51 $\pm$ 1.52  | 92.27 $\pm$ 0.75  |
| 18        | 102.67 $\pm$ 0.85       | 94.56 $\pm$ 1.36  | 95.83 $\pm$ 1.51  |
